# Supplementary material for: Monocarboxylate-protected two-electron superatomic silver nanoclusters with high photothermal conversion performance
Source: Royal Society of Chemistry journal article supplement (doi:10.1039/d3nr00571b), 2023-01-01
Supplement: d3nr00571b1.pdf [file d3nr00571b1.pdf]

## Supporting Information

# Monocarboxylate-Protected Two-Electron Superatomic Silver Nanoclusters with High Photothermal Conversion Performance

Hao-Hai Wang <sup>a†</sup>, Jianyu Wei <sup>a,b†</sup>, Fahime Bigdeli <sup>c†</sup>, Farzaneh Rouhani <sup>c</sup>, Hai-Feng Su <sup>d</sup>,  
Xiao-Ling Wang <sup>a</sup>, Samia Kahlal <sup>b</sup>, Jean-François Halet <sup>b,e</sup>, Jean-Yves Saillard<sup>\*b</sup>, Ali  
Morsali<sup>\*c</sup>, and Kuan-Guan Liu<sup>\*a,d</sup>

<sup>a</sup>Ningxia Key Laboratory for Photovoltaic Materials, School of Materials and New Energy, Ningxia University, Yinchuan, Ningxia 750021, China

<sup>b</sup>Univ Rennes, CNRS, Institut des Sciences Chimiques de Rennes (ISCR) – UMR 6226, F-35000 Rennes, France

<sup>c</sup>Department of Chemistry, Faculty of Sciences, Tarbiat Modares University, Tehran 14115175, Iran.

<sup>d</sup>State Key Lab of Physical Chemistry of Solid Surfaces, Department of Chemistry, College of Chemistry and Chemical Engineering, Xiamen University, 361005, China.

<sup>e</sup>CNRS–Saint-Gobain–NIMS, IRL 3629, Laboratory for Innovative Key Materials and Structures (LINK), National Institute for Materials Science (NIMS), Tsukuba, 305-0044, Japan.

<sup>†</sup> *These authors contributed equally to this work.*

**Table S1.** Crystal data and structural refinement for clusters **I**, **II**, **III** and **IV**

| <i>Compound</i>                                                                                       | <b>I</b>                                                                        | <b>II</b>                                                                                      | <b>III</b>                                                                      | <b>IV</b>                                                                        |
|-------------------------------------------------------------------------------------------------------|---------------------------------------------------------------------------------|------------------------------------------------------------------------------------------------|---------------------------------------------------------------------------------|----------------------------------------------------------------------------------|
| <i>CCDC No.</i>                                                                                       | <b>2081489</b>                                                                  | <b>2081416</b>                                                                                 | <b>2081417</b>                                                                  | <b>2081420</b>                                                                   |
| Chemical formula                                                                                      | <b>C<sub>324</sub>H<sub>228</sub>O<sub>26</sub>P<sub>8</sub>Ag<sub>16</sub></b> | <b>C<sub>324</sub>H<sub>204</sub>O<sub>24</sub>P<sub>8</sub>Cl<sub>24</sub>Ag<sub>16</sub></b> | <b>C<sub>276</sub>H<sub>176</sub>O<sub>56</sub>P<sub>8</sub>Ag<sub>16</sub></b> | <b>C<sub>324</sub>H<sub>228</sub>O<sub>26</sub>As<sub>8</sub>Ag<sub>16</sub></b> |
| fw                                                                                                    | 6510.73                                                                         | 7305.13                                                                                        | 6361.84                                                                         | 6862.33                                                                          |
| Crystal system                                                                                        | Cubic                                                                           | Trigonal                                                                                       | Trigonal                                                                        | Cubic                                                                            |
| Space group                                                                                           | Pa-3                                                                            | R-3                                                                                            | R-3                                                                             | Pa-3                                                                             |
| <i>a</i> , Å                                                                                          | 30.8121(5)                                                                      | 25.6949(11)                                                                                    | 23.1930(3)                                                                      | 31.0591(2)                                                                       |
| <i>b</i> , Å                                                                                          | 30.8121(5)                                                                      | 25.6949(11)                                                                                    | 23.1930(3)                                                                      | 31.0591(2)                                                                       |
| <i>c</i> , Å                                                                                          | 30.8121(5)                                                                      | 41.525(3)                                                                                      | 42.6267(5)                                                                      | 31.0591(2)                                                                       |
| <i>α</i> , deg                                                                                        | 90                                                                              | 90                                                                                             | 90                                                                              | 90                                                                               |
| <i>β</i> , deg                                                                                        | 90                                                                              | 90                                                                                             | 90                                                                              | 90                                                                               |
| <i>γ</i> , deg                                                                                        | 90                                                                              | 120                                                                                            | 120                                                                             | 90                                                                               |
| <i>V</i> , Å <sup>3</sup>                                                                             | 29252.6(14)                                                                     | 23742.97                                                                                       | 19857.6(6)                                                                      | 29961.7(6)                                                                       |
| <i>Z</i>                                                                                              | 4                                                                               | 3                                                                                              | 3                                                                               | 4                                                                                |
| <i>ρ</i> <sub>calc</sub> , g/cm <sup>3</sup>                                                          | 1.478                                                                           | 1.533                                                                                          | 1.596                                                                           | 1.521                                                                            |
| <i>μ</i> , mm <sup>-1</sup>                                                                           | 1.151                                                                           | 1.268                                                                                          | 10.336                                                                          | 1.958                                                                            |
| Reflections collected                                                                                 | 334174                                                                          | 13384                                                                                          | 8010                                                                            | 92316                                                                            |
| Independent reflections                                                                               | 11193                                                                           | 10021                                                                                          | 5604                                                                            | 11454                                                                            |
| <i>R</i> <sub>int</sub>                                                                               | 0.0538                                                                          | 0.0439                                                                                         | 0.0886                                                                          | 0.0803                                                                           |
| Reflections <i>I</i> > 2σ( <i>I</i> )                                                                 | 11193                                                                           | 10021                                                                                          | 5604                                                                            | 11454                                                                            |
| Parameters                                                                                            | 578                                                                             | 930                                                                                            | 572                                                                             | 562                                                                              |
| GOF on <i>F</i> <sup>2</sup>                                                                          | 1.131                                                                           | 0.909                                                                                          | 1.051                                                                           | 1.051                                                                            |
| <i>R</i> <sub>1</sub> <sup>a</sup> / <i>wR</i> <sub>2</sub> <sup>b</sup> ( <i>I</i> > 2σ( <i>I</i> )) | 0.0370/0.0942                                                                   | 0.082/0.2020                                                                                   | 0.0767/0.1853                                                                   | 0.0454/0.1061                                                                    |
| <i>R</i> <sub>1</sub> <sup>a</sup> / <i>wR</i> <sub>2</sub> <sup>b</sup> ( <i>all</i> )               | 0.0411/0.0965                                                                   | 0.904/0.2232                                                                                   | 0.1169/0.2021                                                                   | 0.0741/0.1170                                                                    |
| Largest diff. peak and hole (e.Å <sup>3</sup> )                                                       | 1.751 and -0.581                                                                | 1.67 and -1.24                                                                                 | 1.472 and -0.944                                                                | 0.505 and -1.576                                                                 |

$$^a R_1 = [\sum \text{abs}(\text{abs}(F_o) - \text{abs}(F_c))] / [\sum \text{abs}(F_o)].$$

$$^b wR_2 = [\sum (w(F_o^2 - F_c^2)^2) / \sum (w(F_o^2)^2)]^{0.5}$$

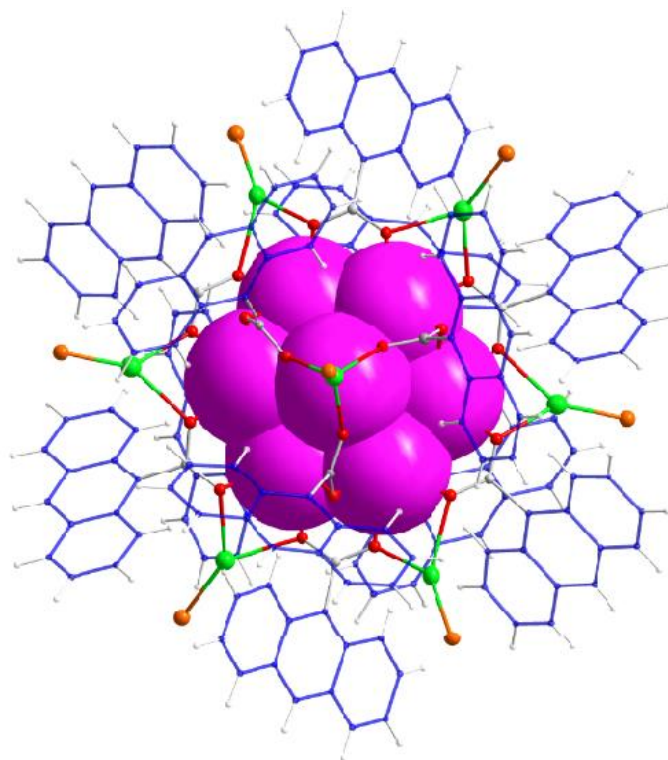

**Figure S1.** Presentation of the  $\text{Ag}_8@Ag_8$  core-shell structure of the cluster  $[\text{Ag}_{16}(\text{L})_8(9\text{-AnCO}_2)_{12}]^{2+}$  [ $\text{L} = \text{Ph}_3\text{P}$  (**I**);  $(4\text{-ClPh})_3\text{P}$  (**II**);  $(2\text{-furyl})_3\text{P}$  (**III**);  $\text{Ph}_3\text{As}$  (**IV**)]. Color code: green, surface Ag; purple space-filling mode, kernel Ag; red, O; gray, C; blue, anthracene groups; gloden, phosphines or arsine ligands.

**Table S2.**  $\text{Ag}\cdots\text{Ag}$  contact lengths [ $\text{\AA}$ ] for clusters **I-IV**

| Cluster <b>I</b>                  |          | Cluster <b>II</b>                 |          | Cluster <b>III</b>                |          | Cluster <b>IV</b>                 |           |
|-----------------------------------|----------|-----------------------------------|----------|-----------------------------------|----------|-----------------------------------|-----------|
| $\text{Ag}(1)\text{-Ag}(1)^{\#2}$ | 2.711(2) | $\text{Ag}(2)\text{-Ag}(2)^{\#3}$ | 2.839(5) | $\text{Ag}(1)\text{-Ag}(1)^{\#1}$ | 2.671(7) | $\text{Ag}(1)\text{-Ag}(1)^{\#2}$ | 2.715(3)  |
| $\text{Ag}(1)\text{-Ag}(1)^{\#3}$ | 2.711(2) | $\text{Ag}(2)\text{-Ag}(3)^{\#4}$ | 2.896(2) | $\text{Ag}(1)\text{-Ag}(1)^{\#2}$ | 2.671(7) | $\text{Ag}(1)\text{-Ag}(1)^{\#1}$ | 2.715(3)  |
| $\text{Ag}(1)\text{-Ag}(3)^{\#1}$ | 2.852(3) | $\text{Ag}(2)\text{-Ag}(3)^{\#5}$ | 2.897(2) | $\text{Ag}(1)\text{-Ag}(2)$       | 2.886(8) | $\text{Ag}(1)\text{-Ag}(2)^{\#3}$ | 2.854(4)  |
| $\text{Ag}(1)\text{-Ag}(3)$       | 3.131(3) | $\text{Ag}(2)\text{-Ag}(3)^{\#3}$ | 2.897(2) | $\text{Ag}(1)\text{-Ag}(2)^{\#3}$ | 3.067(8) | $\text{Ag}(1)\text{-Ag}(2)$       | 3.131(4)  |
| $\text{Ag}(3)\text{-Ag}(3)^{\#1}$ | 2.752(7) | $\text{Ag}(2)\text{-Ag}(3)$       | 3.033(2) | $\text{Ag}(2)\text{-Ag}(2)^{\#3}$ | 2.723(2) | $\text{Ag}(2)\text{-Ag}(2)^{\#3}$ | 2.742(10) |

**Table S3.** Ag-O Bond lengths [ $\text{\AA}$ ] for clusters I- IV

| Cluster I                |          | Cluster II               |           | Cluster III              |          | Cluster IV               |          |
|--------------------------|----------|--------------------------|-----------|--------------------------|----------|--------------------------|----------|
| Ag(1)-O(2)               | 2.357(2) | Ag(1)-O(3)               | 2.363(13) | Ag(1)-O(3)               | 2.306(6) | Ag(1)-O(3)               | 2.355(3) |
| Ag(1)-O(4) <sup>#1</sup> | 2.362(3) | Ag(1)-O(3) <sup>#1</sup> | 2.363(13) | Ag(1)-O(2)               | 2.341(7) | Ag(1)-O(2) <sup>#1</sup> | 2.358(3) |
| Ag(1)-O(1)               | 2.484(2) | Ag(1)-O(3) <sup>#2</sup> | 2.363(13) | Ag(1)-O(1)               | 2.438(7) | Ag(1)-O(1)               | 2.491(3) |
| Ag(2)-O(1)               | 2.267(2) | Ag(2)-O(3)               | 2.351(14) | Ag(2)-O(4) <sup>#4</sup> | 2.340(7) | Ag(2)-O(4) <sup>#1</sup> | 2.422(3) |
| Ag(2)-O(2)               | 2.397(2) | Ag(2)-O(3) <sup>#1</sup> | 2.351(14) | Ag(2)-O(4)               | 2.340(7) | Ag(2)-O(4) <sup>#2</sup> | 2.422(3) |
| Ag(3)-O(3) <sup>#4</sup> | 2.432(2) | Ag(2)-O(3) <sup>#2</sup> | 2.351(14) | Ag(2)-O(4) <sup>#5</sup> | 2.340(7) | Ag(2)-O(4) <sup>#3</sup> | 2.422(3) |
| Ag(3)-O(3) <sup>#5</sup> | 2.432(2) | Ag(3)-O(2)               | 2.322(19) | Ag(3)-O(4) <sup>#4</sup> | 2.345(8) | Ag(3)-O(1)               | 2.258(3) |
| Ag(3)-O(3)               | 2.432(2) | Ag(3)-O(1) <sup>#5</sup> | 2.366(18) | Ag(3)-O(4)               | 2.345(8) | Ag(3)-O(2) <sup>#1</sup> | 2.357(3) |
| Ag(4)-O(3)               | 2.359(2) | Ag(3)-O(4) <sup>#4</sup> | 2.375(14) | Ag(3)-O(4) <sup>#5</sup> | 2.345(8) | Ag(4)-O(4)               | 2.350(3) |
| Ag(4)-O(3) <sup>#4</sup> | 2.359(2) | Ag(4)-O(1)               | 2.037(19) | Ag(4)-O(1)               | 2.221(7) | Ag(4)-O(4) <sup>#4</sup> | 2.350(3) |
| Ag(4)-O(3) <sup>#5</sup> | 2.359(2) | Ag(4)-O(2) <sup>#4</sup> | 2.434(19) | Ag(4)-O(2)               | 2.353(7) | Ag(4)-O(4) <sup>#5</sup> | 2.350(3) |

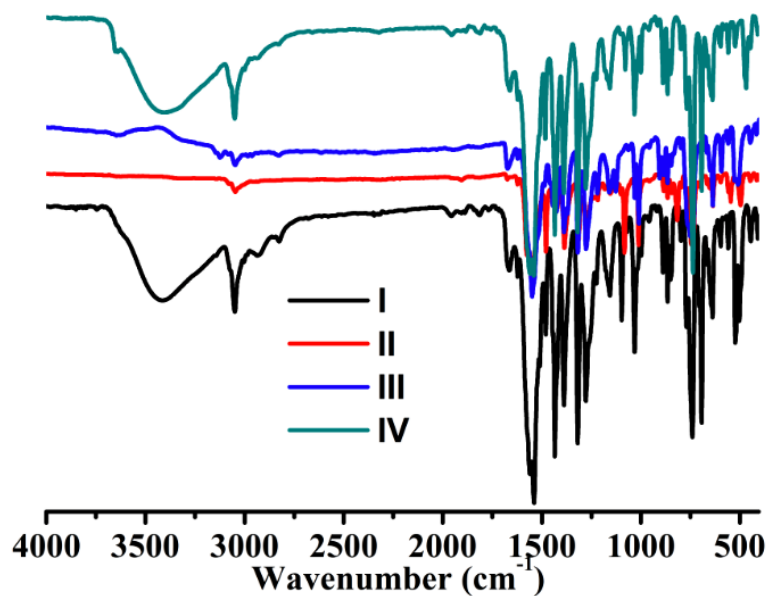

**Figure S2.** FT-IR spectra of the clusters I- IV

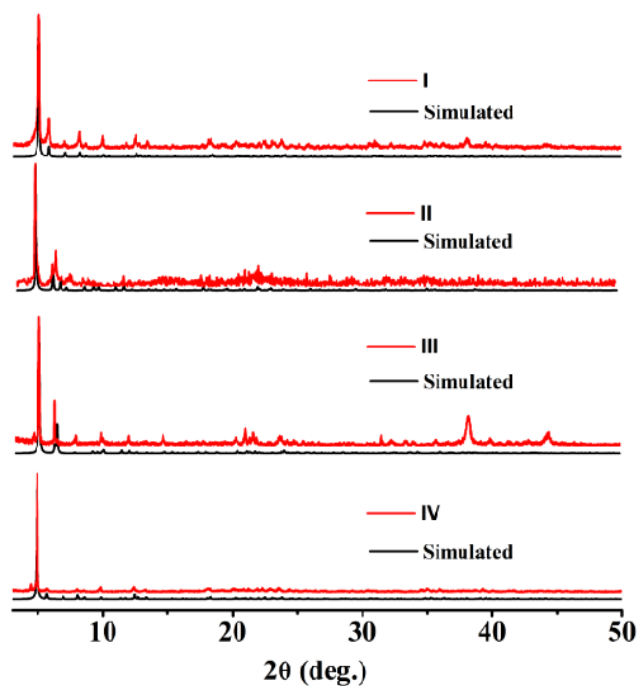

**Figure S3.** XRD patterns of the clusters **I-IV**

**Table S4.** Bond lengths [ $\text{\AA}$ ] for clusters **I-IV**

| Cluster I  |            | Cluster II |          | Cluster III |          | Cluster IV  |            |
|------------|------------|------------|----------|-------------|----------|-------------|------------|
| Ag(2)-P(1) | 2.3625(8)  | Ag(1)-P(1) | 2.336(8) | Ag(3)-P(2)  | 2.322(4) | Ag(3)-As(1) | 2.4414(6)  |
| Ag(4)-P(2) | 2.3297(14) | Ag(4)-P(2) | 2.360(7) | Ag(4)-P(1)  | 2.332(3) | Ag(4)-As(2) | 2.4147(10) |

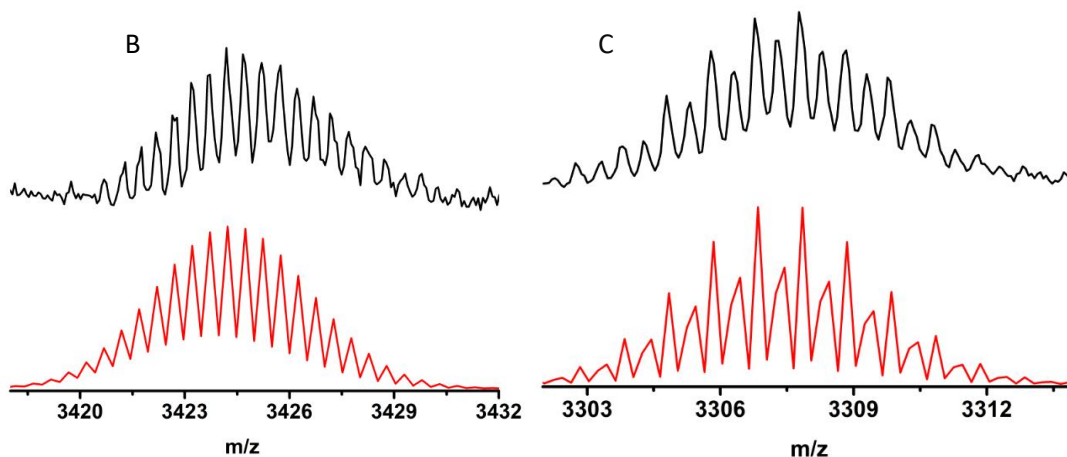

**Figure S4.** Presentation of the Zoom-in ESI-MS of the crystal **IV** dissolved in  $\text{CH}_3\text{OH}$ , experimental (blackline) and simulated (red line) isotopic patterns; Peak B centered at  $m/z = 3424.21$  and Peak C centered at  $m/z = 3307.33$ , assigned to the formulas of  $[\text{M}+\text{H}_2\text{O}]^{2+}$  (calculated  $m/z = 3424.28$ ) and  $[\text{M}-2\text{Ag}^0]^{2+}$  (calculated  $m/z = 3307.40$ ),  $\text{M} = [\text{Ag}_{16}(\text{Ph}_3\text{As})_8(9\text{-AnCO}_2)_{12}]$  (**IV**).

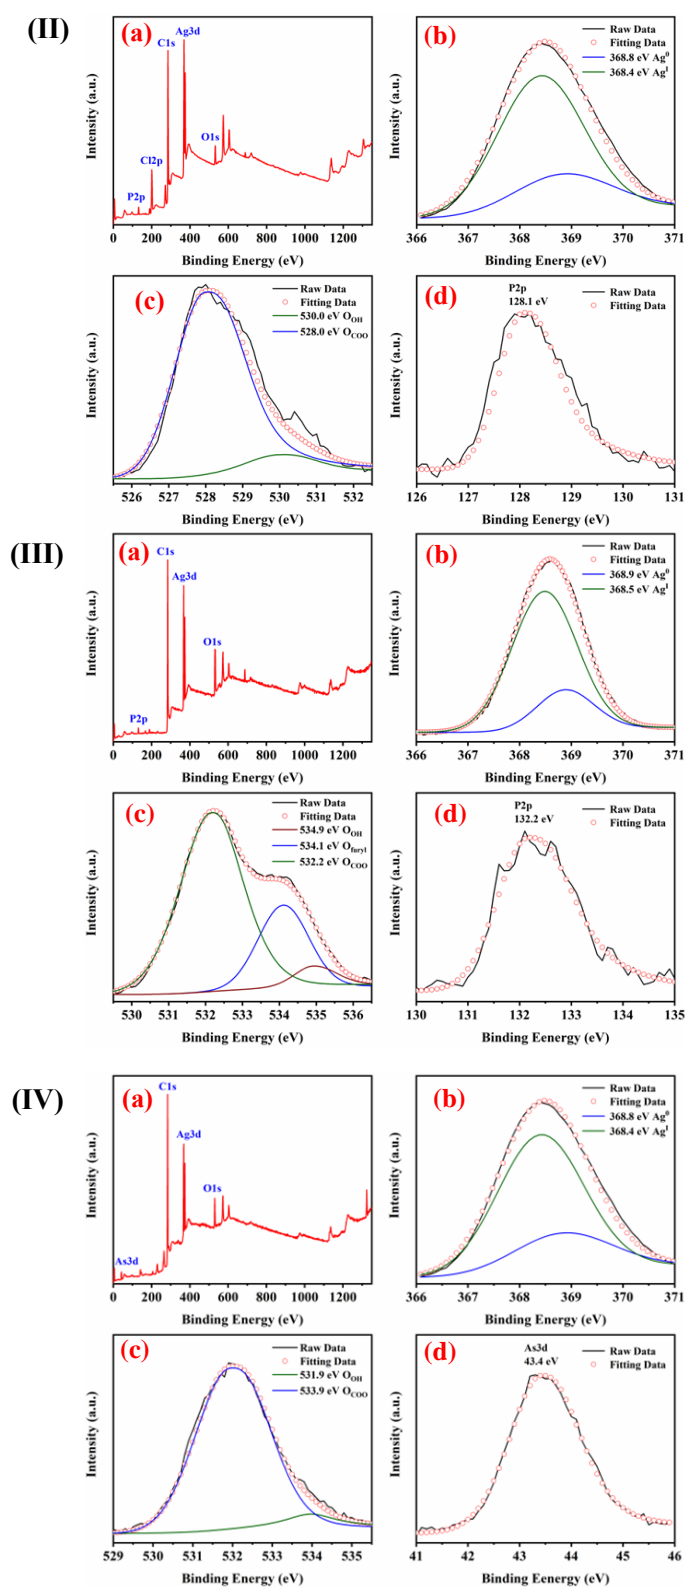

**Figure S5.** Full XPS spectra (a) and high-resolution XPS spectra [Ag3d (b), O1s (c), and P2p (d)] of nanocluster **II**; Full XPS spectra (a) and high-resolution XPS spectra [Ag3d (b), O1s (c), and P2p (d)] of nanocluster **III**; Full XPS spectra (a) and high-resolution XPS spectra [Ag3d (b), O1s (c), and As3d (d)] of nanocluster **IV**.

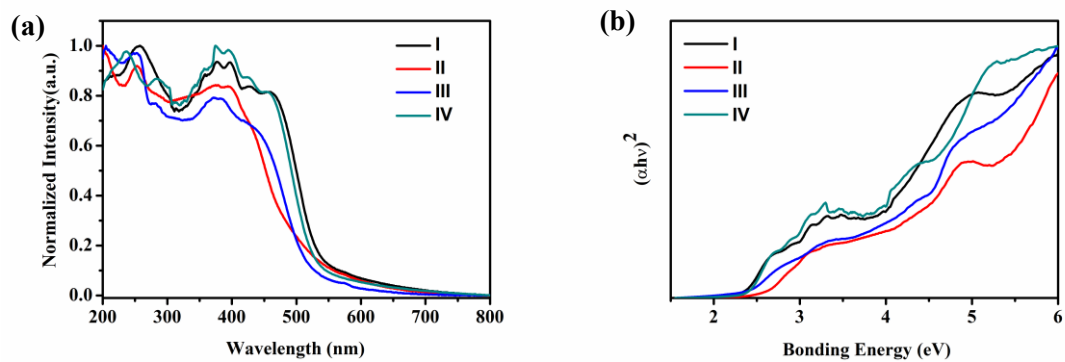

**Figure S6.** The solid-state UV-vis absorption spectra (a) and diffuse reflectance spectra (b) of the clusters I-IV.

I

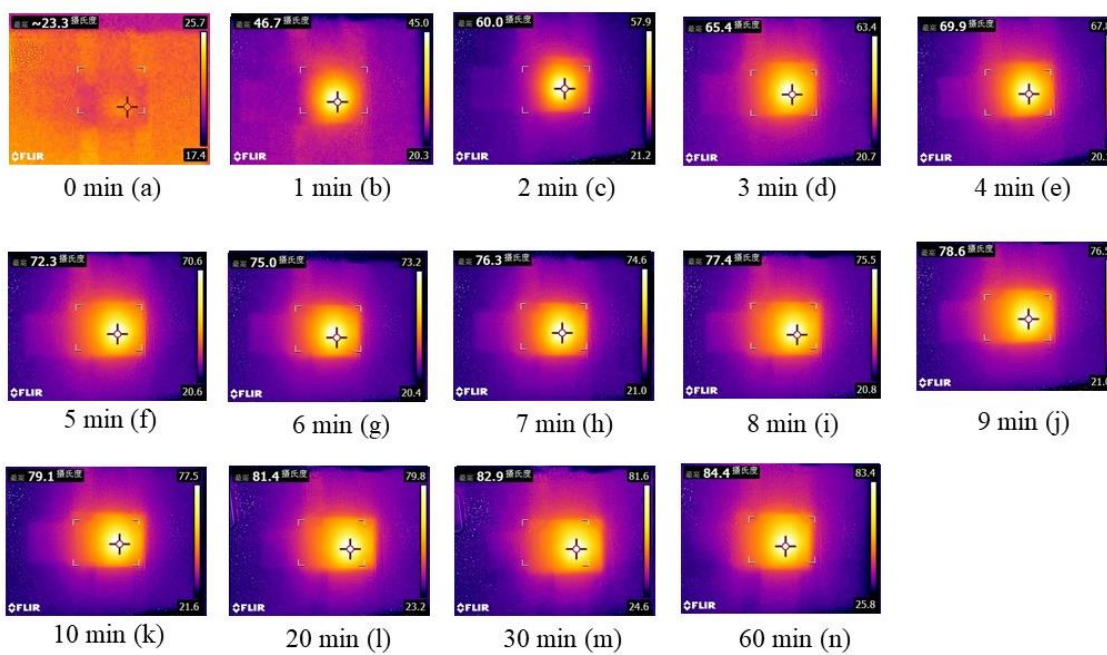

II

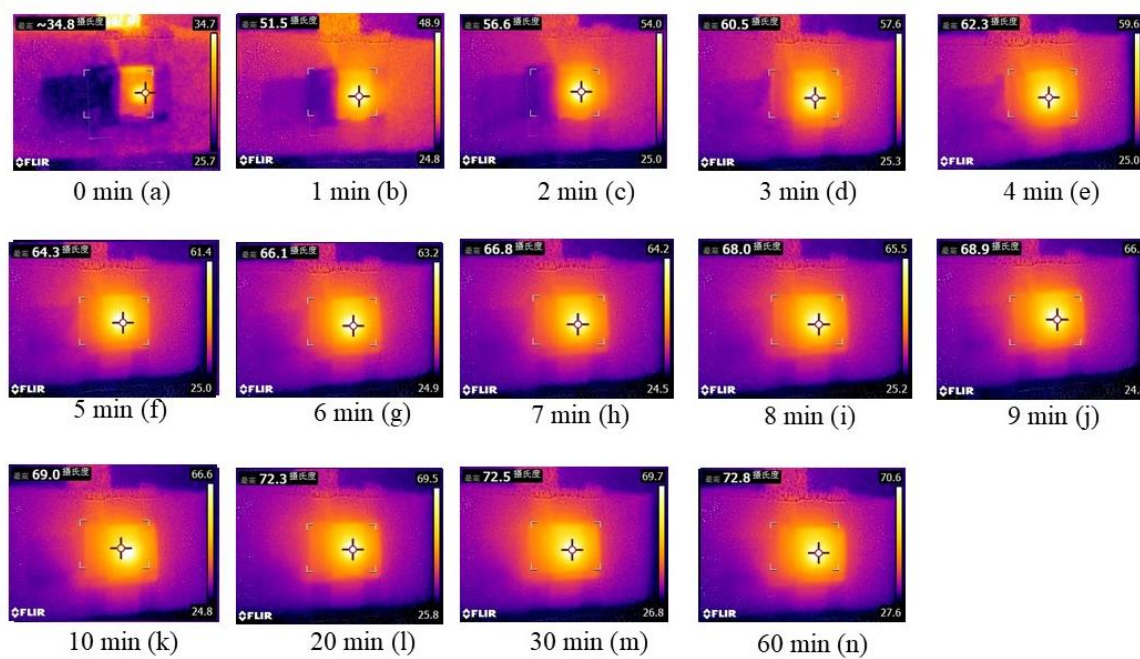



### III

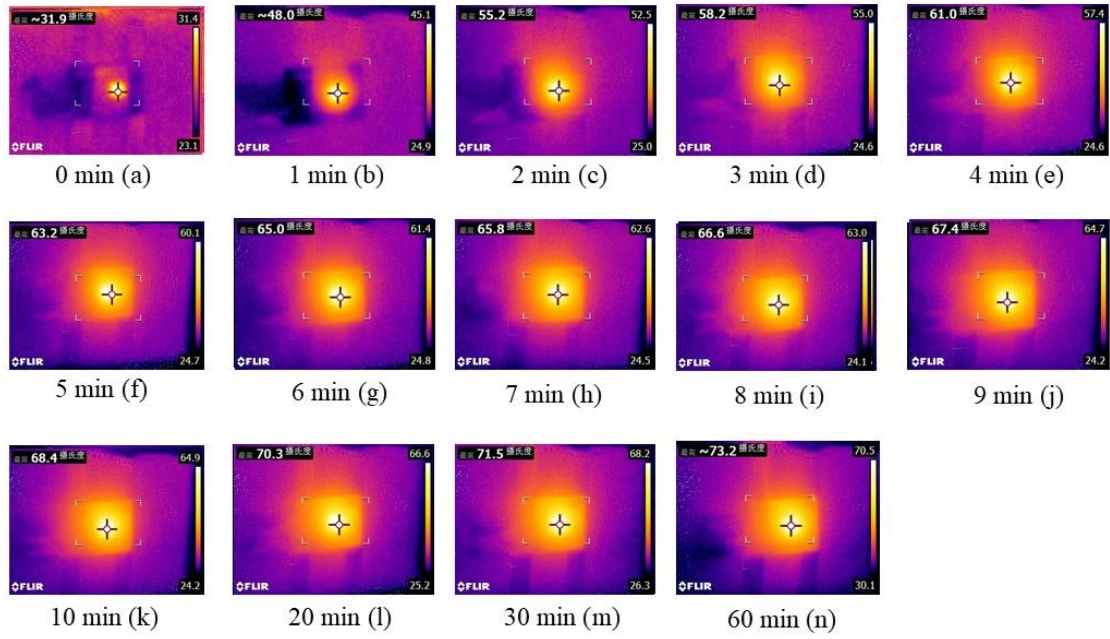

### IV

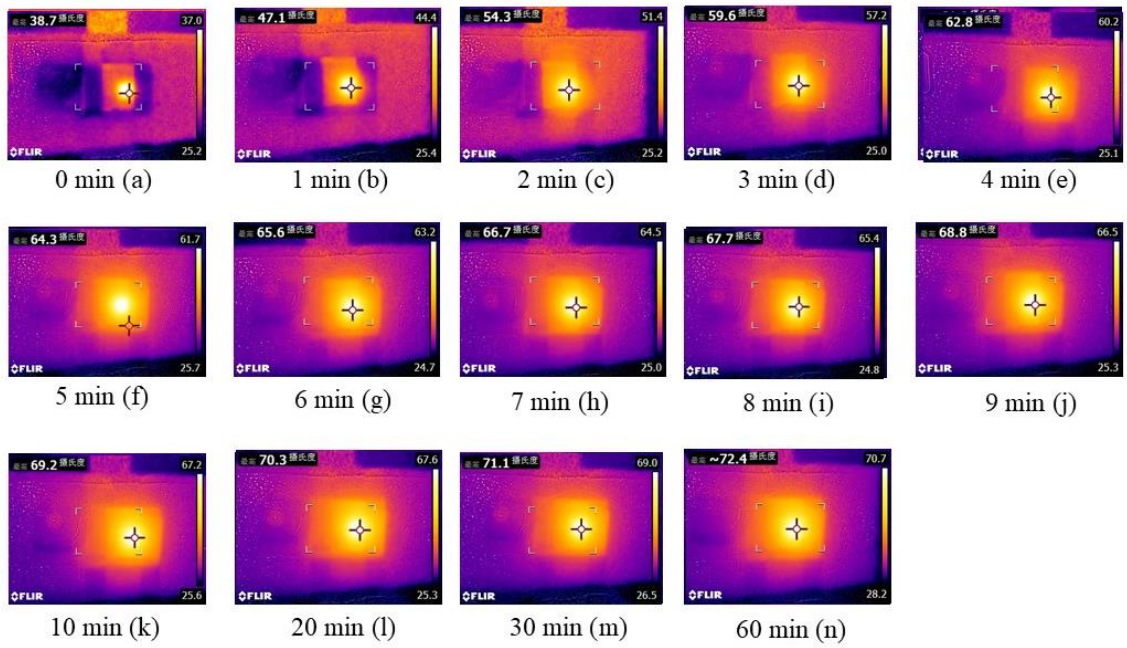

Figure S7. Temperature enhancement of the clusters I- IV over time due to light radiation.

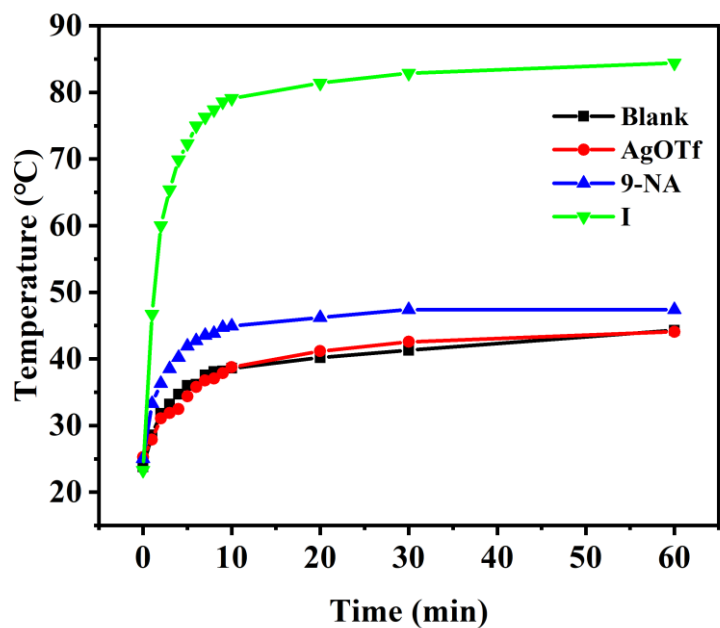

**Figure S8.** The temperature variation curves of the background (quartz glass), the metal precursors (AgOTf), the 9-Anthracene carboxylic acid ligand (9-NA) and cluster **I**.

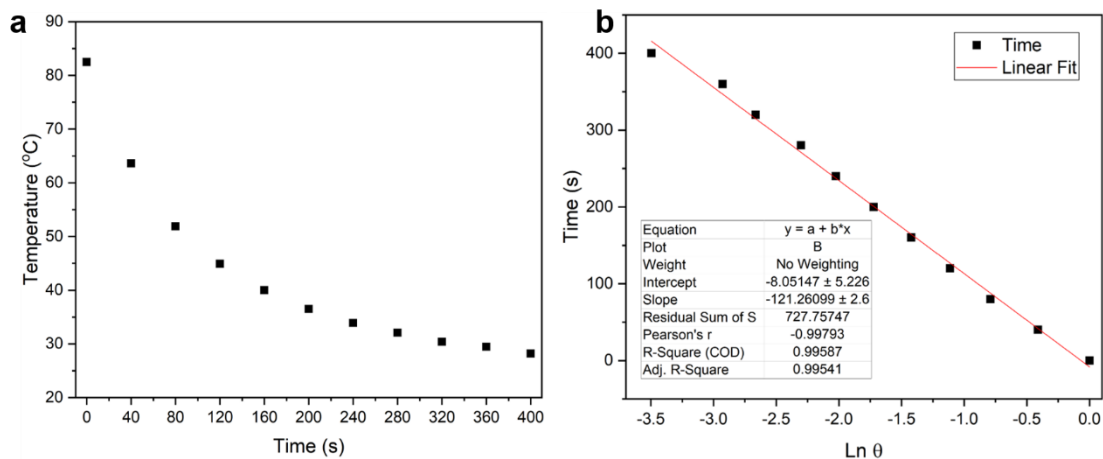

**Figure S9** The cooling curve of **I** after irradiation with 400 nm laser ( $0.832 \text{ W} \cdot \text{cm}^{-2}$ ) (a) and its corresponding time- $\ln\theta$  linear curve (b).

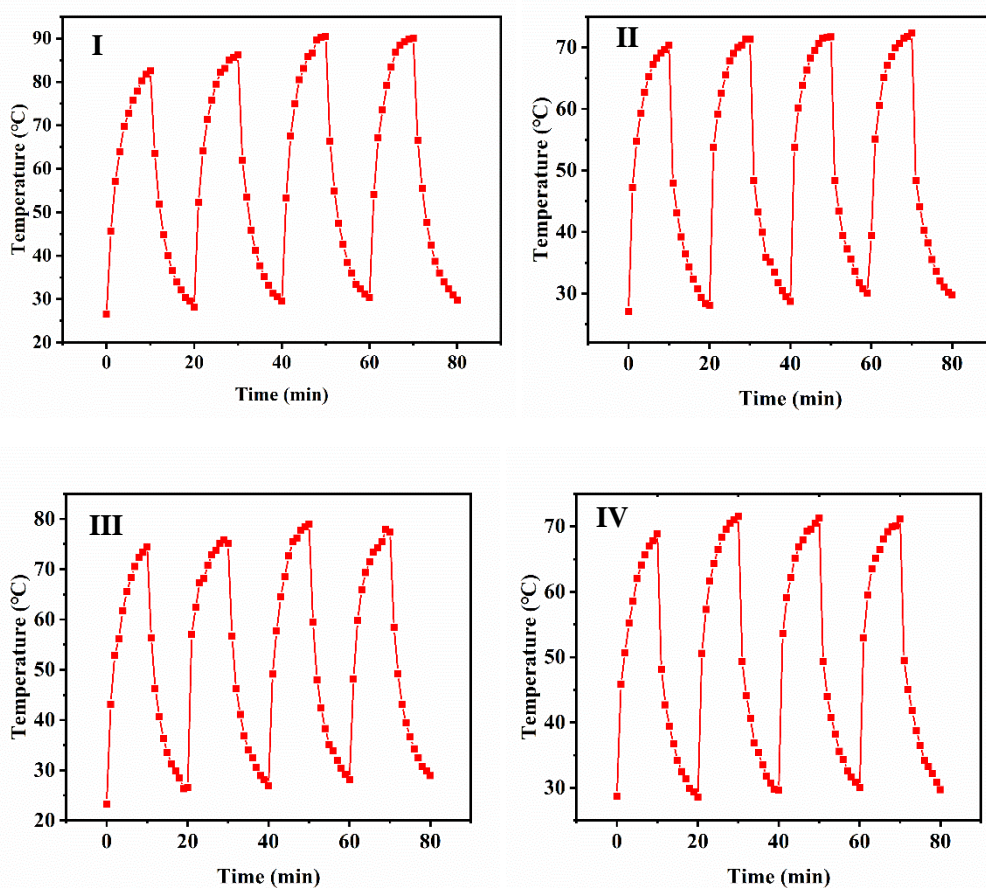

**Figure S10.** The temperature variation curves of nanoclusters **I-IV** for 4 photothermal cycles.

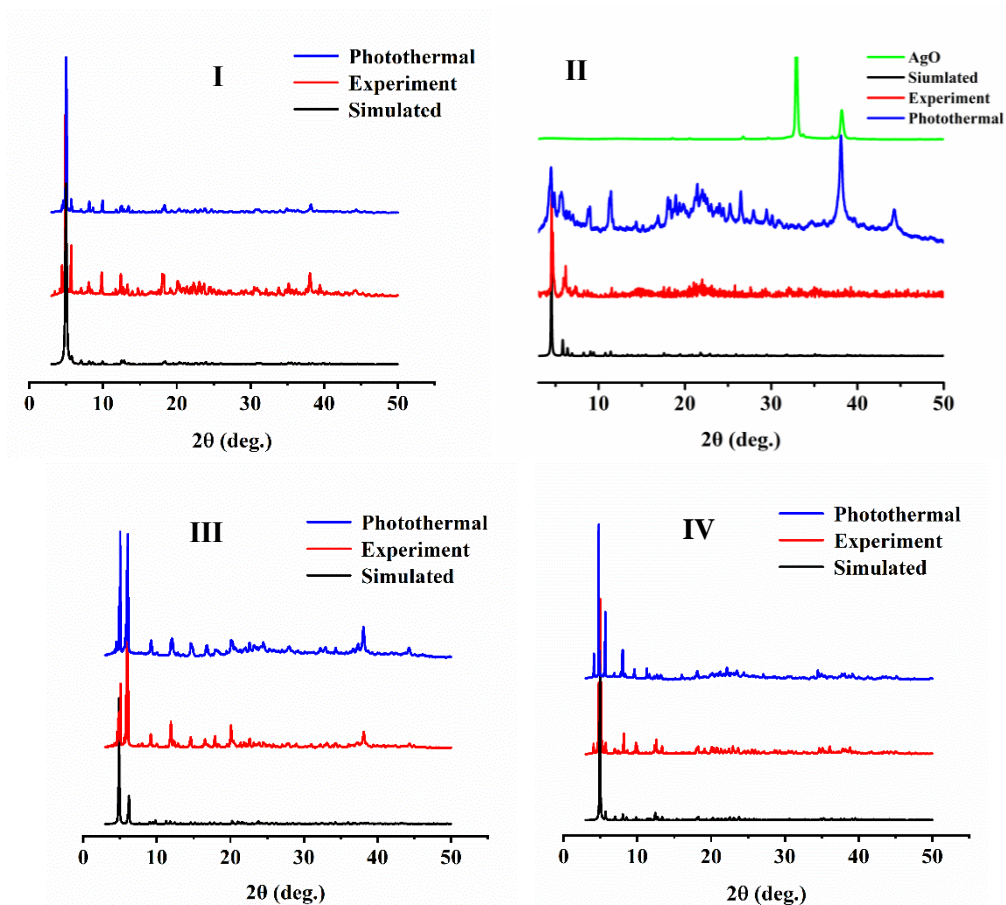

**Figure S11.** The XRD patterns of nanoclusters **I-IV** before and after 4 photothermal cycles.

## Photothermal Conversion Efficiency

The photothermal conversion efficiency was calculated according to a previous method<sup>1</sup>. The calculations on the cluster **I** is shown as an example. Details are as follows:

Based on the total energy balance for this system:

$$\sum_i m_i C_{p,i} \frac{dT}{dt} = Q_s - Q_{loss}$$

where  $m_i$  (0.81 g) and  $C_{p,i}$  ( $0.8 \text{ J (g } ^\circ\text{C)}^{-1}$ ) are the mass and heat capacity of system components (Cluster **I** and quartz glass), respectively.  $Q_s$  is the photothermal heat energy input by irradiating **I**, and  $Q_{loss}$  is thermal energy lost to the surroundings. When the temperature is maximum, the system is in balance.

$$Q_s = Q_{loss} = hS\Delta T_{max}$$

where  $h$  is heat transfer coefficient,  $S$  is the surface area of the container,  $\Delta T_{max}$  is the maximum temperature change. The photothermal conversion efficiency  $\eta$  is calculated from the following equation:

$$\eta = \frac{hS\Delta T_{max}}{I(1 - 10^{-A_{400}})}$$

where  $I$  is the laser power ( $0.831 \text{ W cm}^{-2}$ ) and  $A_{400}$  is the absorbance of **I** at the wavelength of 400 nm (0.91).

In order to obtain the  $hS$ , a dimensionless driving force temperature,  $\theta$  is introduced as follows:

$$\theta = \frac{T - T_{surr}}{T_{max} - T_{surr}}$$

where  $T$  is the temperature of **I**,  $T_{max}$  is the maximum system temperature ( $82.5 \text{ }^\circ\text{C}$ ), and  $T_{surr}$  is the initial temperature ( $26.5 \text{ }^\circ\text{C}$ ).

The sample system time constant  $\tau_s$

$$\tau_s = \frac{\sum_i m_i C_{p,i}}{hS}$$

$$\text{thus } \frac{d\theta}{dt} = \frac{1}{\tau_s} \frac{Q_s}{hS\Delta T_{max}} - \frac{\theta}{\tau_s}$$

when the laser is off,  $Q_s = 0$ , therefore  $\frac{d\theta}{dt} = -\frac{\theta}{\tau_s}$ , and  $t = -\tau_s \ln \theta$

so  $hS$  could be calculated from the slope of cooling time vs  $\ln \theta$ . Therefore,  $\tau_s$  is 121.26 s (Figure S9) and the photothermal conversion efficiency  $\eta$  is 41.1%.

## Reference

- 1 B. Kim, H. Shin, T. Park, H. Lim and E. Kim, *Adv. Mater.*, 2013, **25**, 5483.
